# Supplementary material
Source: Springer Nature journal article supplement (https://www.springermedizin.de/resource/supplementary/12883_2014_964_MOESM1_ESM.pdf/9456526)
Supplement: MOESM1 [file 9456526]

Six university and 8 non-university hospitals in The Netherlands

Admission, n=1500

Baseline data collection:

- Clinical data
- Laboratory tests
- Imaging data
  - NCCT
  - CTP
  - CTA

Inclusion criteria:

- $\geq 18$  years
- NIHSS  $\geq 2$  (or 1 if indication for IV-rtPA)
- Symptoms  $< 9$  hours

Exclusion criteria

- Other diagnosis than ischemia on NCCT
- Known contrast allergy
- Renal failure

Follow-up around day 3

Day 1-3 after admission:

- Clinical data collection
- Laboratory tests

Day 3:

- Repeated CT imaging
  - NCCT
  - CTP
  - CTA

In case of clinical deterioration: NIHSS and NCCT

Study outcomes:

- Clinical outcome assessed with the mRS (primary study outcome)
- Infarct size on follow-up NCCT
- (A)symptomatic haemorrhage on follow-up NCCT
- Reperfusion on follow-up CTP
- Recanalisation on follow-up CTA
- Barthel Index and EQ-5D

Follow-up at discharge  
and 90 days

At discharge:

- Final diagnosis
- 90 days:
- Clinical outcome (mRS)
  - Barthel Index, EQ-5D
